# Supplementary material for: Gut Health and Its Association with Wellbeing and Nutrient Intake in Community-Dwelling Older Adults
Source: MDPI journal article supplement (doi:10.3390/gastroent13040035), 2022-10-17
Supplement: s1 [file s1]

Archive with 1 entries (1 files):
- gastroent-1909873-supplementary.pdf
