# Supplementary material for: Gut Health and Its Association with Wellbeing and Nutrient Intake in Community-Dwelling Older Adults
Source: MDPI journal article supplement (doi:10.3390/gastroent13040035), 2022-10-17
Supplement: s1 [file s1 › gastroent-1909873-supplementary.pdf]

**Supplementary Table S1.** Participant characteristics and well-being stratified by presence of gastrointestinal (GI) symptoms, compared with Mann-Whitney U and Chi2.

| Variable                   | All participants<br>n=237* | Have GI<br>symptoms<br>n= 155 | No GI<br>symptoms<br>n= 82 | p-value          |
|----------------------------|----------------------------|-------------------------------|----------------------------|------------------|
| <b>Age</b>                 |                            |                               |                            |                  |
| Years, median (IQR)        | 72 (69-76)                 | 72 (69-76)                    | 71 (68-75)                 | 0.450            |
| Age above 79, % (n)        | 16% (39)                   | 18% (28)                      | 12% (10)                   | 0.269            |
| <b>Sex</b>                 |                            |                               |                            |                  |
| Females, % (n)             | 66% (159)                  | 68% (105)                     | 62% (51)                   | 0.392            |
| <b>Smoking</b>             |                            |                               |                            |                  |
| Smokers % (n)              | 5% (11)                    | 3% (5)                        | 6% (5)                     | 0.321            |
| <b>Physical activity</b>   |                            |                               |                            |                  |
| Score, median (IQR)        | 4 (3-4)                    | 4 (3-4)                       | 4 (3-4)                    | 0.960            |
| <b>Polypharmacy</b>        |                            |                               |                            |                  |
| ≥5 medications % (n)       | 16% (39)                   | 19% (29)                      | 12% (10)                   | 0.269            |
| <b>Number of medicines</b> |                            |                               |                            |                  |
| Median (IQR)               | 2 (1-4)                    | 2 (1-4)                       | 2 (1-3)                    | 0.125            |
| <b>Depression</b>          |                            |                               |                            |                  |
| Score, median (IQR)        | 2 (1-3)                    | 2 (1-4)                       | 1 (0-3)                    | 0.177            |
| Cut off (>7), % (n)        | 4% (9)                     | 4% (6)                        | 4% (3)                     | 1.000            |
| <b>Anxiety</b>             |                            |                               |                            |                  |
| Score, median (IQR)        | 3 (1-5)                    | 4 (1-6)                       | 2 (0-5)                    | <b>0.001</b>     |
| Cut off (>7), % (n)        | 10% (23)                   | 10% (16)                      | 9% (7)                     | 0.819            |
| <b>Stress</b>              |                            |                               |                            |                  |
| Score, median (IQR)        | 10 (6-14)                  | 10 (7-14)                     | 7 (4-12)                   | <b>0.001</b>     |
| <b>Quality of life</b>     |                            |                               |                            |                  |
| Median (IQR)               |                            |                               |                            |                  |
| EQ-Index                   | 0.8 (0.8-1.0)              | 0.8 (0.8-0.9)                 | 0.9 (0.8-1)                | <b>&lt;0.001</b> |
| EQ-VAS                     | 80 (75-90)                 | 80 (70-90)                    | 90 (80-90)                 | <b>0.002</b>     |

\*Four participants did not fill in the questionnaire Gastrointestinal Symptom Rating Score (GSRS), hence were excluded. Having a GI symptom representing a participant getting scoring >2 on their GSRS total mean score. IQR - interquartile range, showed by quartile 1 and quartile 3 within brackets, EQ - EuroQol,  $p < 0.05$  were considered significant, marked in bold.

**Supplementary Table S2.** Weights of the first two components of the PCA in Figure 2 and Supplementary Figure S1.

|                             | <b>Principal component 1</b> | <b>Principal component 2</b> |
|-----------------------------|------------------------------|------------------------------|
| <b>Polypharmacy</b>         | 0,211965378                  | 0,068796848                  |
| <b>Diarrhoea</b>            | 0,313347185                  | 0,050215922                  |
| <b>Dyspepsia</b>            | 0,305997618                  | 0,119097537                  |
| <b>Constipation</b>         | 0,291534064                  | 0,173955834                  |
| <b>Abdominal Pain</b>       | 0,350296446                  | 0,105160513                  |
| <b>Reflux</b>               | 0,194504518                  | 0,040004455                  |
| <b>Depression</b>           | 0,214003095                  | 0,066518059                  |
| <b>Anxiety</b>              | 0,308061978                  | 0,109627016                  |
| <b>Stress</b>               | 0,305372053                  | 0,092170086                  |
| <b>HRQOL</b>                | -0,331173217                 | -0,162036978                 |
| <b>PhysicalActivity</b>     | -0,177403133                 | -0,039743829                 |
| <b>Protein</b>              | -0,085188306                 | -0,121468318                 |
| <b>Saturated fat</b>        | 0,216930345                  | -0,413826426                 |
| <b>Mono unsaturated fat</b> | 0,181597608                  | -0,480195129                 |
| <b>Poly unsaturated fat</b> | -0,010021612                 | -0,252313167                 |

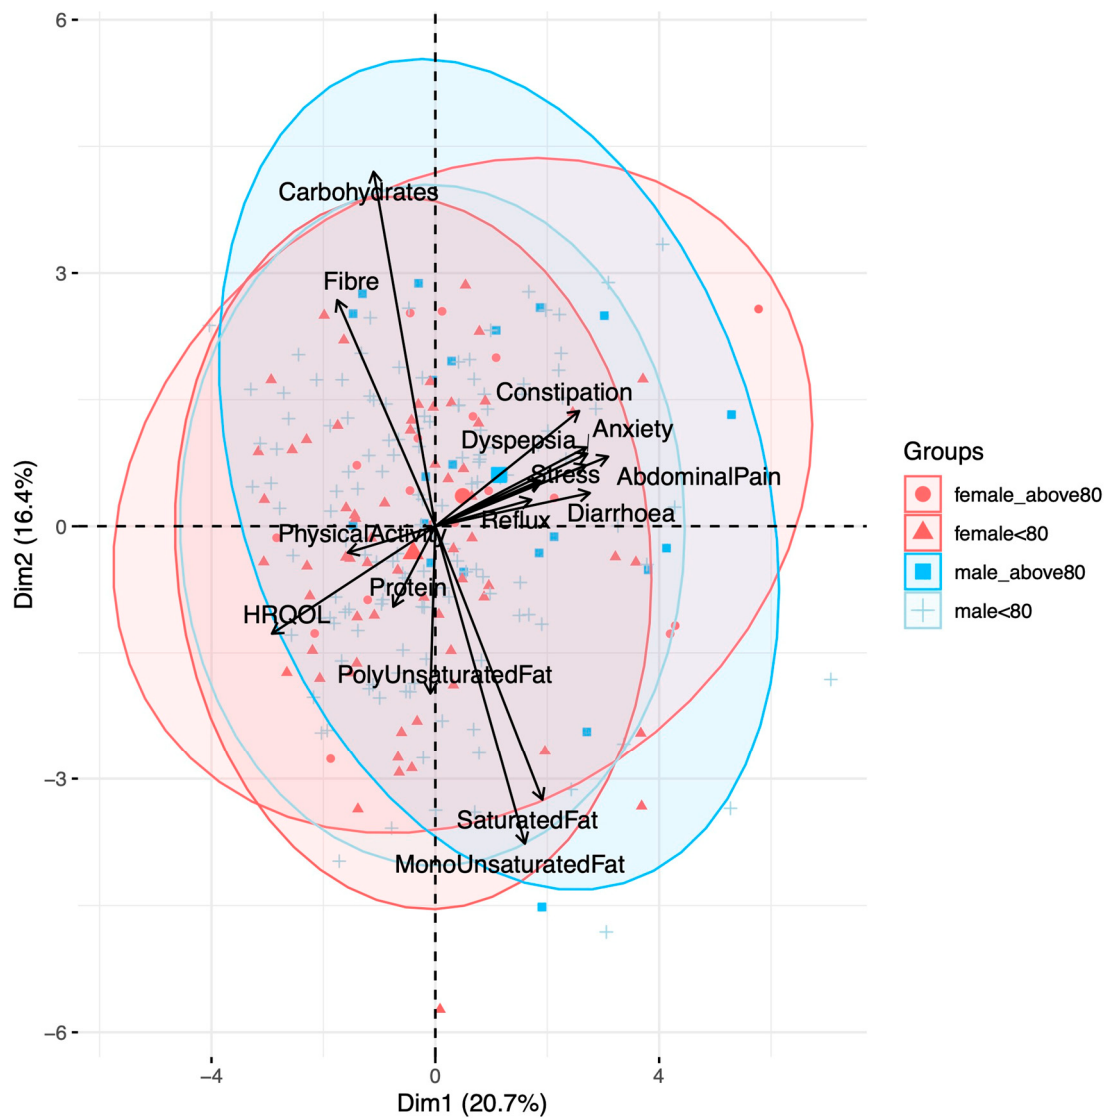

**Supplementary figure S1.** Principal component analysis displaying the relationship between all investigated parameters within the different age groups. The main components of each dimension can be seen in supplementary Table 2. The five different gastrointestinal (GI) symptoms (dyspepsia, abdominal pain, constipation, diarrhoea and reflux) are grouped together with stress, anxiety, depression and polypharmacy. Health-related quality of life (HRQOL), as depicted by EuroQol (EQ)-index, grouped together with physical activity. The highest degree of separation was observed between GI symptoms to both HRQOL (EQ-index) and physical activity. A less degree of separation was seen between protein intake and GI symptoms, stress, polypharmacy, anxiety, and depression. Carbohydrates and fats, the two major sources of energy, had as expected the highest degree of separation.
